# Supplementary figures and images for: Uncertainty assessment of a dominant-process catchment model of dissolved phosphorus transfer
Source: Copernicus journal article supplement (doi:10.5194/hess-2015-545), 2016-01-19

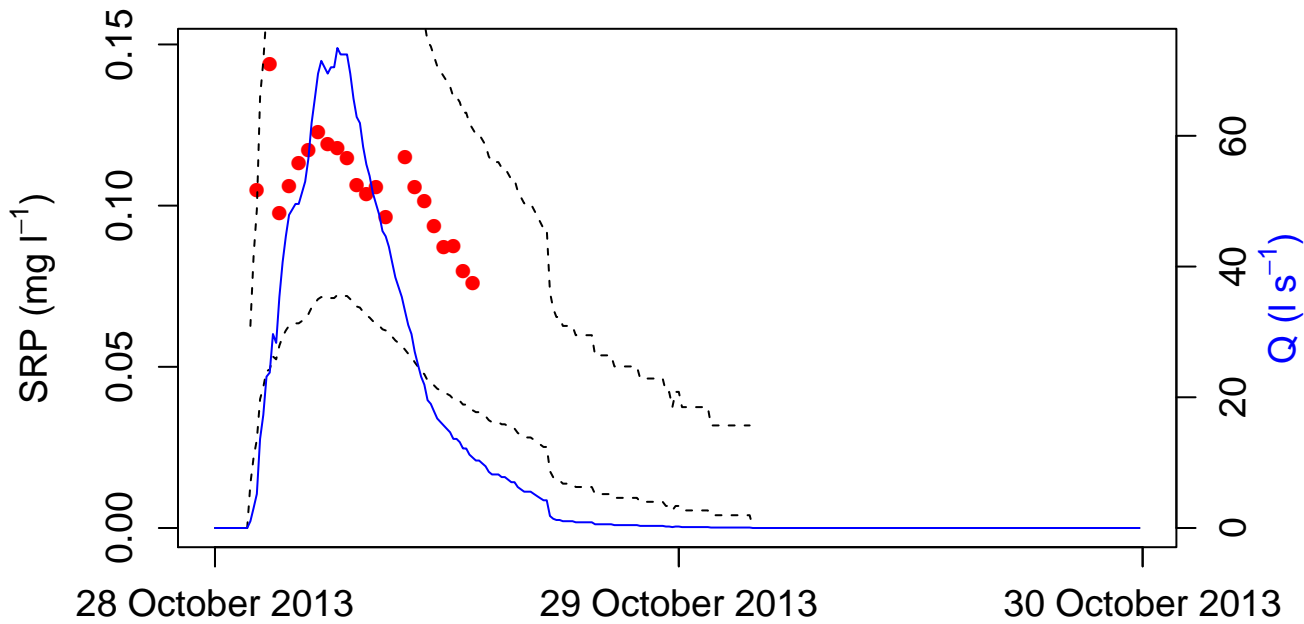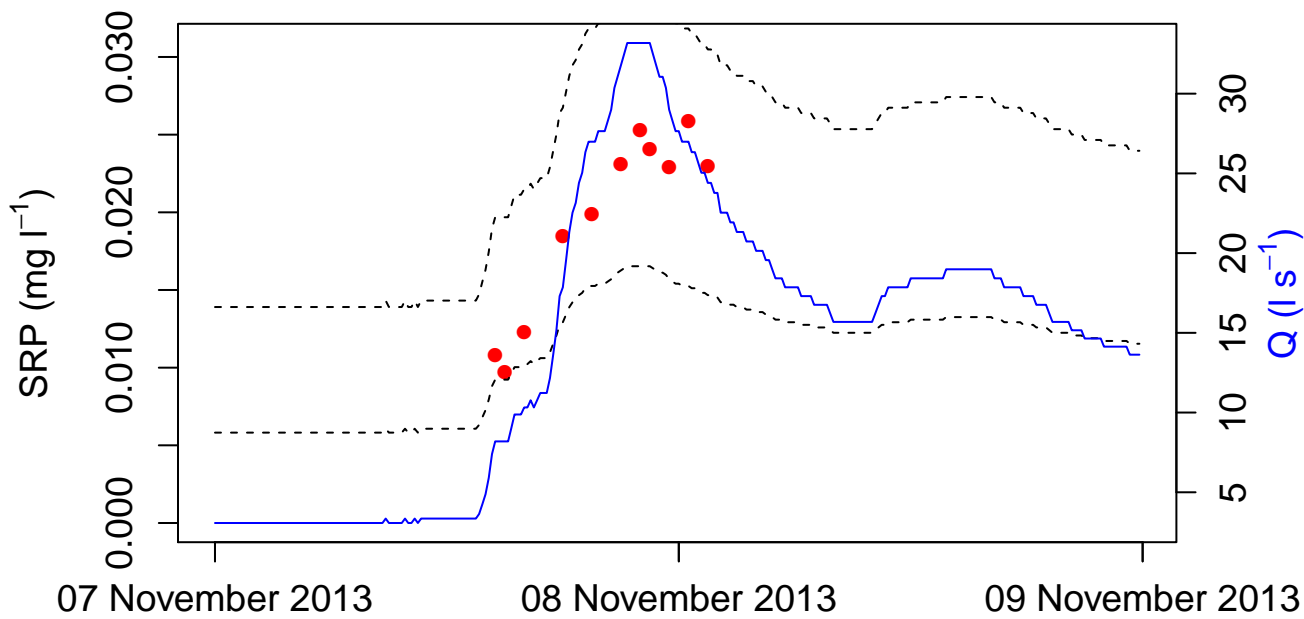

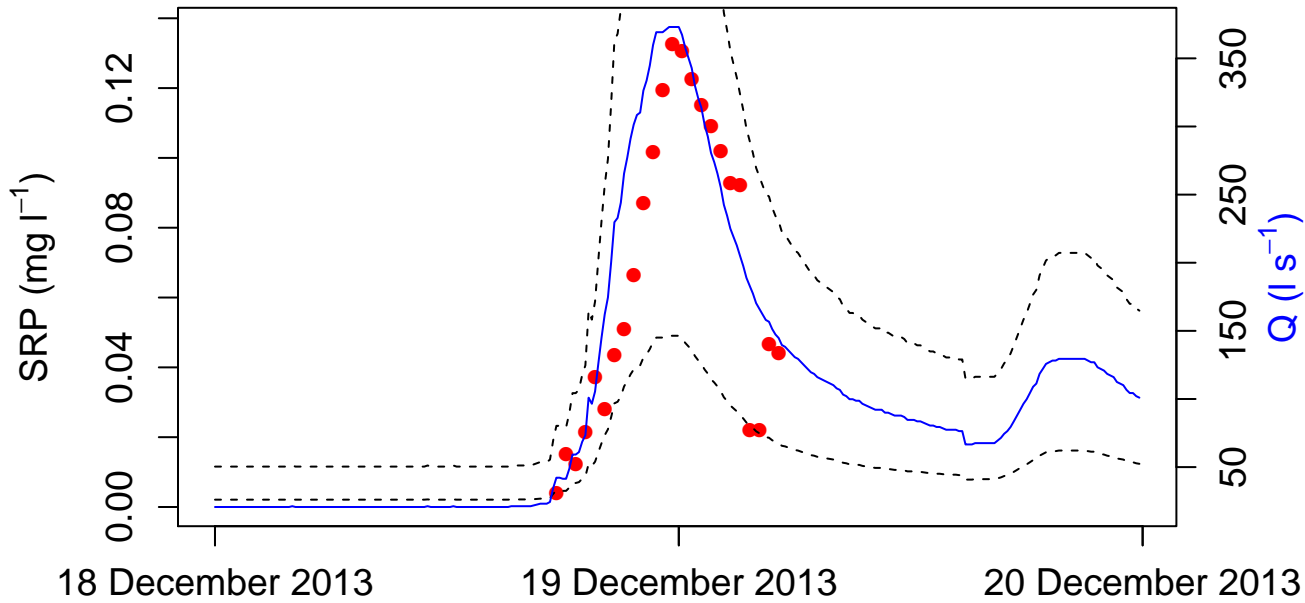



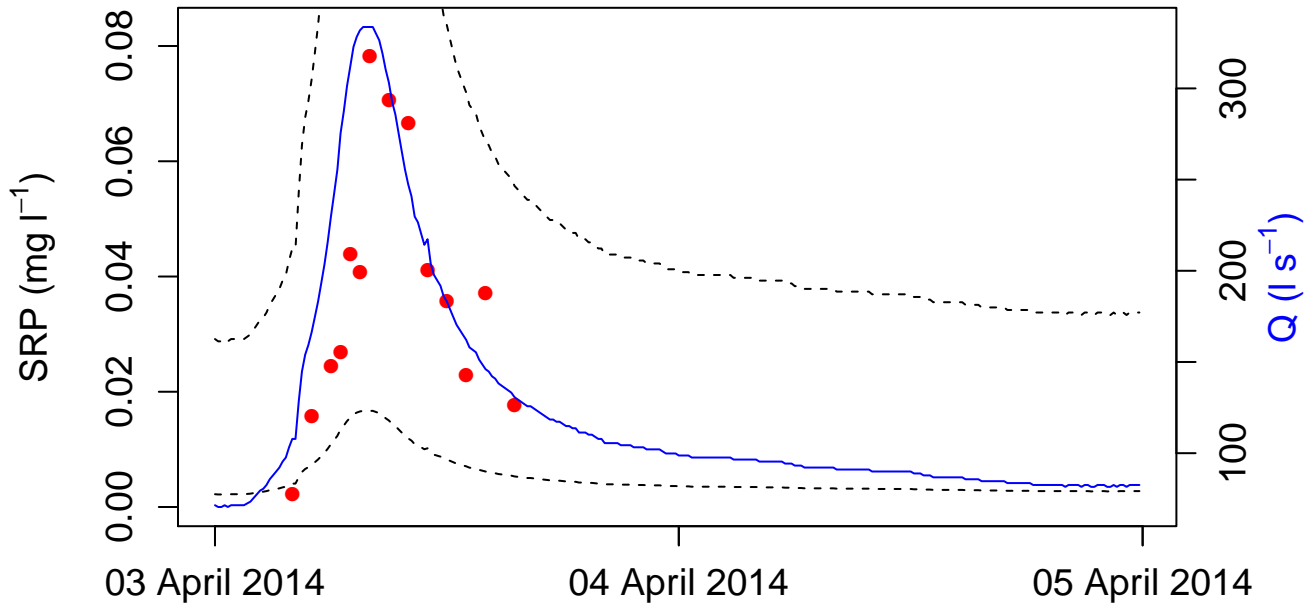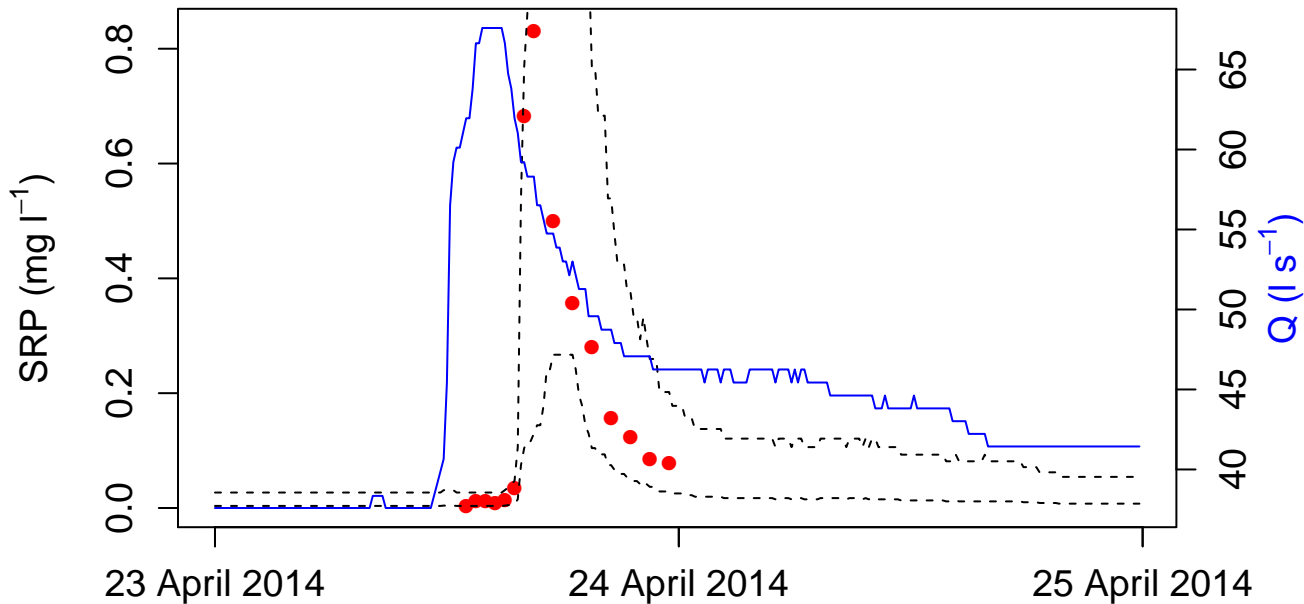

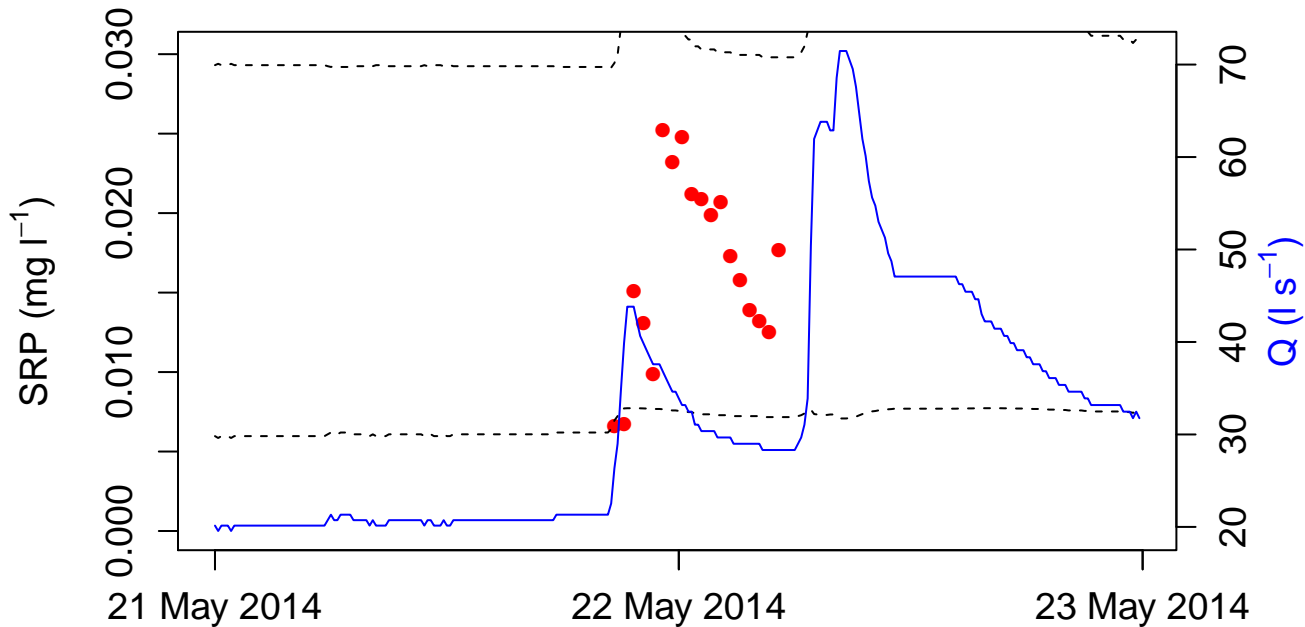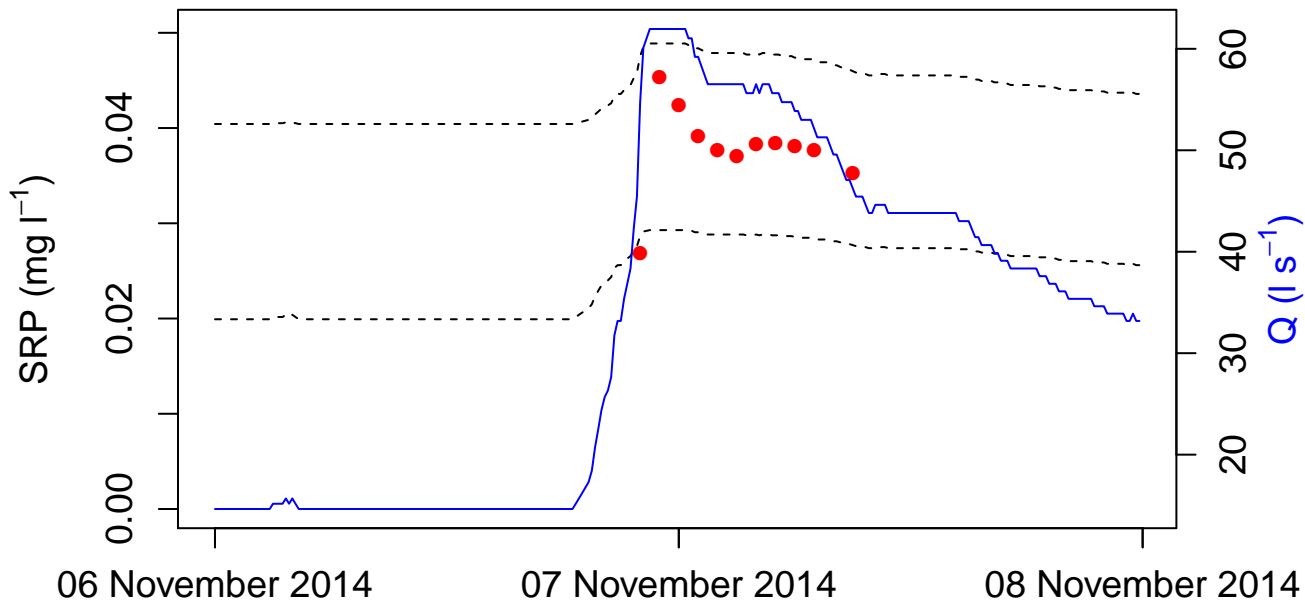



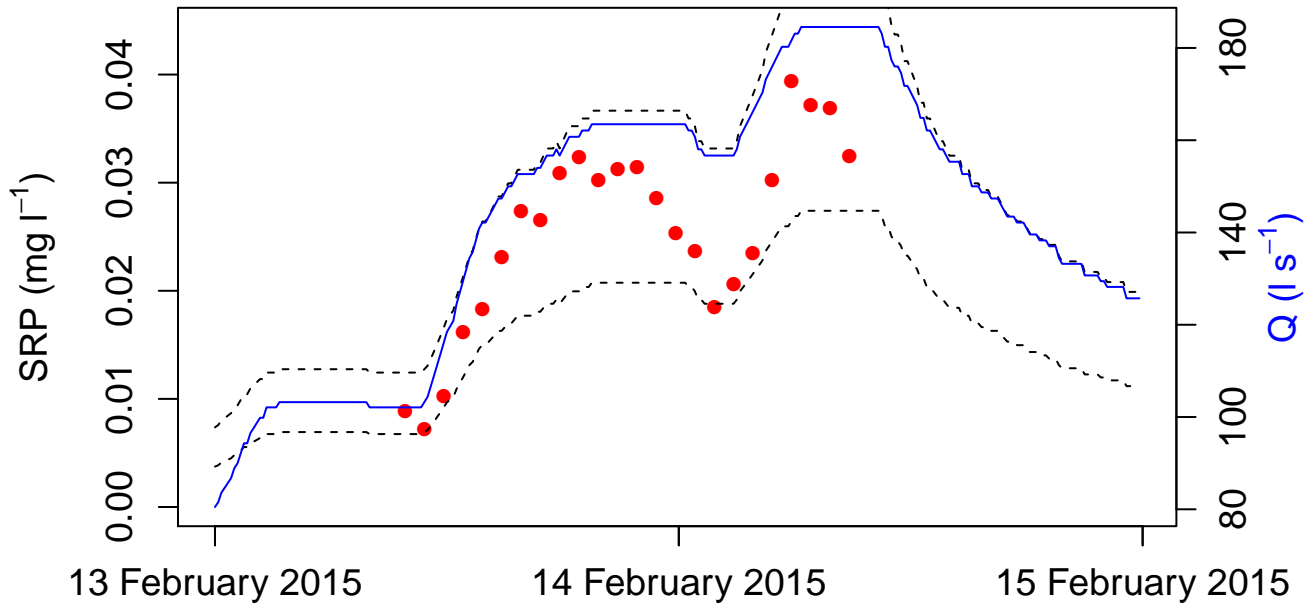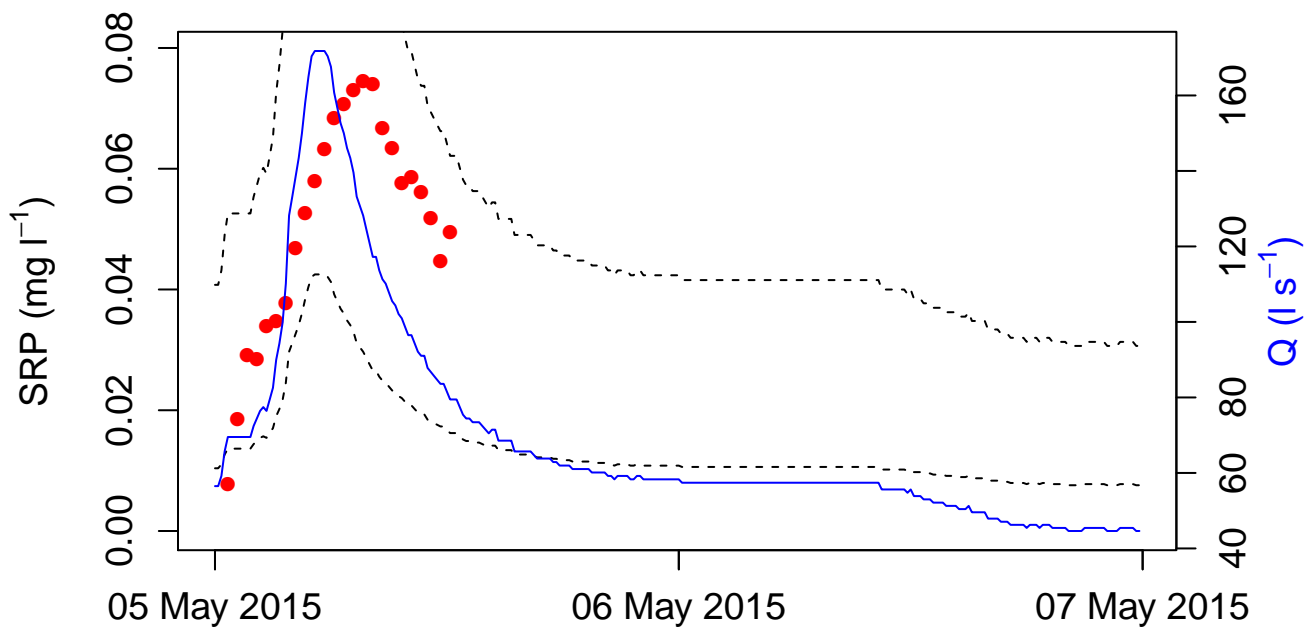

Supplement: Supplementary file 1 [file hess-2015-545-supplement.pdf]
